# Supplementary material
Source: MDPI journal article supplement (https://www.mdpi.com/2073-4433/11/10/1098)
Supplement: s1 [file s1]

Supplementary Table 1. Cited Studies of Metal Inhalation or Intranasal Instillation in Relation to Impacts on Shared Characteristics of Neurodevelopmental Disorders and Neurodegenerative Diseases.

| Study                   | Metal | Species and Sex                   | Route of Exposure       | Exposure Parameters                                                                                           | Effects                                                                                                                                                                                                                        |
|-------------------------|-------|-----------------------------------|-------------------------|---------------------------------------------------------------------------------------------------------------|--------------------------------------------------------------------------------------------------------------------------------------------------------------------------------------------------------------------------------|
| Wang et al., 2007       | Fe    | male CD-1CR mice                  | Intranasal instillation | 40 mg Fe <sub>2</sub> O <sub>3</sub> /kg<br>280 nm                                                            | Increased Fe in olfactory bulb and trigeminus of brain stem; neuronal fatty degeneration in CA3 region of hippocampus                                                                                                          |
| Wu et al., 2013         | Fe    | 4 wk old male Sprague Dawley rats | Intranasal instillation | 20 ug Fe <sub>3</sub> O <sub>4</sub> for 6 consecutive days<br>30 nm                                          | Increased Fe in olfactory bulb, hippocampus, striatum, cortex and cerebellum with > 50% still evident 14 days post-instillation. Increase in oxidative damage markers in striatum and hippocampus                              |
| Wang et al., 2016       | Fe    | male CD-1CR mice                  | Intranasal instillation | 40 mg Fe <sub>2</sub> O <sub>3</sub> /kg<br>40 vs. 280 nm                                                     | Size- and time-dependent translocation pattern; particle-like substances identified in olfactory bulb axons and in hippocampal mitochondria and lysosomes; self-coating of nanoparticles with apotransferrin occurred in brain |
| Sutunkova et al., 2016  | Fe    | Outbred white female rats         | Nose only inhalation    | 1.14 mg/m <sup>3</sup> Fe <sub>2</sub> O <sub>3</sub><br>14 nm for 4 hr/day<br>5 days/week for 3, 6 or 10 mos | NPs located within myelin sheath in brain                                                                                                                                                                                      |
| Hopkins et al., 2018    | Fe    | Adult female C57B6 mice           | Whole body inhalation   | 40 µg/m <sup>3</sup> Fe <sub>2</sub> O <sub>3</sub><br>6hr/day 5 days/week for 5 weeks                        | Fe reached brain via olfactory nerves; increased ratio of activated to resting microglia                                                                                                                                       |
| Askri et al., 2018      | Fe    | Male Wistar rats                  | Intranasal instillation | 10 mg/kg Fe <sub>2</sub> O <sub>3</sub><br>day for 7 days 30 nm                                               | Marked increases in brain dopamine and norepinephrine levels but no changes in anxiety-like behavior or learning/memory                                                                                                        |
| Lubczynska et al., 2017 | Fe    | Children 1-9 yr of age            | Ambient airborne        | 50-500 ng/m <sup>3</sup>                                                                                      | Inverse association between Fe and fine motor function                                                                                                                                                                         |
|                         |       |                                   |                         |                                                                                                               |                                                                                                                                                                                                                                |
| Zhang et al., 2012      | Cu    | Female CD-1 (ICR) mice            | Intranasal instillation | Purchased Cu NPs at 1 or 40 mg/kg body weight instilled 7 or 10 times<br>23 nm                                | Alterations in dopaminergic function in striatum, olfactory bulb, hippocampus, cerebral cortex, and cerebellum and in serotonergic function in olfactory bulb, hippocampus, cerebral cortex and cerebellum                     |
| Liu et al., 2014        | Cu    | Female CD-1 (ICR) mice            | Intranasal instillation | Purchased Cu NPs at 1 or 40 mg/kg body weight for administered 3 times in 5 days<br>23 nm                     | Mitochondrial shrinkage in olfactory cells and dissociation of endoplasmic reticulum ribosomes in hippocampus; increased numbers of astrocytes in CA1 region of hippocampus                                                    |
| Bai et al., 2014        | Cu    | Female CD-1 (ICR) mice            | Intranasal instillation | Purchased Cu NPs at 1 or 40 mg/kg body weight instilled 21 times<br>23 nm                                     | Altered distribution of brain trace elements; reductions in neurons in                                                                                                                                                         |
| Pujol et al., 2016      | Cu    | 8-12 year old children            | Ambient airborne        | Mean of 8.7 ng/m <sup>3</sup>                                                                                 | Airborne Cu was associated with poorer motor performance and incomplete development of basal ganglia                                                                                                                           |
|                         |       |                                   |                         |                                                                                                               |                                                                                                                                                                                                                                |

|                        |    |                                                   |                         |                                                                                                                                            |                                                                                                                                                                                                                                                                                                                                                                                                                |
|------------------------|----|---------------------------------------------------|-------------------------|--------------------------------------------------------------------------------------------------------------------------------------------|----------------------------------------------------------------------------------------------------------------------------------------------------------------------------------------------------------------------------------------------------------------------------------------------------------------------------------------------------------------------------------------------------------------|
| Alemanly et al., 2017  | Cu | 7-12 year old children                            | Ambient airborne        | Mean of 7.8 ug/m <sup>3</sup>                                                                                                              | Indoor Cu was associated with inattentiveness especially in children with modifications of the <i>ATP7B</i> gene                                                                                                                                                                                                                                                                                               |
| Persson et al., 2003   | Zn | Male Sprague Dawley Rats                          | Intranasal instillation | ZnCl <sub>2</sub> 0.03 µg (5 µCi) per 10 µl                                                                                                | Uptake in olfactory epithelium along primary olfactory neurons to olfactory bulb where Zn found bound to cellular and cytosolic constituents, including metallothionein                                                                                                                                                                                                                                        |
| Kao et al., 2012       | Zn | Male Sprague Dawley rats                          | Whole body chamber      | ZnO for 4 hr on 3 consecutive days = 2 x 10 <sup>6</sup> , 3.4 x 10 <sup>6</sup> and 6.6 x 10 <sup>6</sup> particles/cm <sup>3</sup> 14 nm | Demonstrates olfactory bulb-brain translocation requiring endocytosis for interneuron translocation of particles                                                                                                                                                                                                                                                                                               |
| Liu et al., 2020       | Zn | Male Wistar rats                                  | Intranasal instillation | ZnO NPs at 20 µg/body weight for 5, 10 or 15 days                                                                                          | Deposition of Zn in olfactory bulb, and striatum; increases in malondialdehyde, TNF-α and IL-1β and decreased glutathione in multiple brain regions; swollen mitochondria and Golgi apparatus and particle deposition in nerve fibers in olfactory bulb; vacuolated mitochondria and cell degeneration in hippocampus, reduction in mitochondria and particles in nerve fibers in striatum and cerebral cortex |
| Dorman et al., 2002    | Mn | Male CD rats                                      | Nose only               | MnHPO <sub>4</sub> 0.39 mg <sup>54</sup> Mn/m <sup>3</sup> 1.68 µm                                                                         | Mn uptake via olfactory route                                                                                                                                                                                                                                                                                                                                                                                  |
| Normandin et al., 2002 | Mn | Male Sprague Dawley rats                          | Whole body inhalation   | MnPO <sub>4</sub> at 30, 300 or 3000 ug/m <sup>3</sup> for 6 hr/day for 5 day/week for 13 weeks ≤ 6 µm                                     | Increase in Mn in all brain regions. No effect on neuronal loss in caudate/putamen or globus pallidus, nor in locomotor activity or tremor assessment                                                                                                                                                                                                                                                          |
| Dobson et al., 2003    | Mn | Male CrI:CD (SD)BR rats                           | Whole body inhalation   | MnSO <sub>4</sub> at 0.03, 0.3, or 3.0 ug/m <sup>3</sup> for 6 hr/day for 7 day/week for 2 weeks 1.5-2 µm                                  | Increased glutamine synthetase in olfactory bulb and hypothalamus at medium and high doses; reductions in glutathione and increase in metallothionein mRNA in hypothalamus                                                                                                                                                                                                                                     |
| Dorman et al., 2004    | Mn | Male and female CD rats                           | Whole body inhalation   | MnSO <sub>4</sub> at 0.01, 0.1, or 0.5 mg Mn m <sup>3</sup> for 6 hr/day 5 day/week for 90 days; ~2 µm                                     | Young male olfactory bulb Mn concentrations > young female or aged male                                                                                                                                                                                                                                                                                                                                        |
| Erikson et al., 2004   | Mn | Male and female CD rats                           | Whole body inhalation   | MnSO <sub>4</sub> at 0.01, 0.1, or 0.5 mg Mn m <sup>3</sup> for 6 hr/day 5 day/week for 90 days; ~2 µm                                     | Sex- and dose-dependent alterations in glutamine synthetases and glutathione levels in cerebellum, hippocampus, hypothalamus, olfactory bulb and striatum                                                                                                                                                                                                                                                      |
| Lewis et al., 2005     | Mn | Male and female Fischer 344/N rats and FVB/N mice | Nose only               | MnCl <sub>2</sub> at 2.3 mg/m <sup>3</sup> for rat and 2.0 mg/m <sup>3</sup> for mice for 6 hr/day for 5 days/week for 10 days;            | Uptake in trigeminal nerve of both mice and rats with clearance half-time of 7-8 days                                                                                                                                                                                                                                                                                                                          |

|                                 |    |                              |                         |                                                                                                                                                      |                                                                                                                                                                                                                     |
|---------------------------------|----|------------------------------|-------------------------|------------------------------------------------------------------------------------------------------------------------------------------------------|---------------------------------------------------------------------------------------------------------------------------------------------------------------------------------------------------------------------|
|                                 |    |                              |                         | 3.1 $\mu\text{m}$ for rat and 1.98 $\mu\text{m}$ for mice                                                                                            |                                                                                                                                                                                                                     |
| Erikson et al., 2005            | Mn | Male and female CD rats      | Whole body inhalation   | MnSO <sub>4</sub> at 0.05, 0.5 or 1.0 mg Mn/m <sup>3</sup> from gestational day 0 to postnatal day 19 for 6 hr/day for 7 days/week; ~2 $\mu\text{m}$ | Region- and sex-dependent alterations in glutamine synthetase, glutathione, metallothionein and tyrosine hydroxylase that persisted at least to 3 weeks post-exposure                                               |
| Tapin et al., 2006              | Mn | Male Sprague Dawley rats     | Whole body inhalation   | MnSO <sub>4</sub> at 30, 300 or 3000 $\mu\text{g}/\text{m}^3$ for 6 hr/day for 5 day/week for 13 weeks $\leq 6 \mu\text{m}$                          | Reductions in neurons in globus pallidus at two highest doses; reductions in locomotor activity and total ambulatory count reduced at all 3 doses.                                                                  |
| Elder et al., 2006              | Mn | Male Fischer 344 rats        | Intranasal inhalation   | MnO at ~500 $\mu\text{g}/\text{m}^3$ for 6 hr/day 5 days/week for 11 or 12 days                                                                      | Increased Mn in olfactory bulb as well as in striatum, frontal cortex and cerebellum as well as increases in TNF- $\alpha$ mRNA and protein, MIP-2, GFAP and neuronal cell adhesion molecule mRNA in olfactory bulb |
| Dorman et al., 2006             | Mn | Rhesus monkeys               | Whole body inhalation   | MnSO <sub>4</sub> at 0.06, mg Mn/m <sup>3</sup> for 6 hr/day for 5 days/week for 65 days; ~1-2 $\mu\text{m}$                                         | Direct olfactory transport in a non-human primate                                                                                                                                                                   |
| Erikson et al., 2006            | Mn | Male and female CD rats      | Whole body inhalation   | MnSO <sub>4</sub> at 0.05, 0.5 or 1.0 mg Mn/m <sup>3</sup> from gestational day 0 to postnatal day 19 for 6 hr/day for 7 days/week; ~2 $\mu\text{m}$ | Region-dependent alterations in glutamine synthetase, glutathione, metallothionein and tyrosine hydroxylase (not differentiated by sex)                                                                             |
| Erikson et al., 2007            | Mn | Rhesus monkeys               | Whole body inhalation   | MnSO <sub>4</sub> at 0.06, 0.3 or 1.5 mg Mn/m <sup>3</sup> for 6 hr/day for 5 days/week for 65 days; ~2 $\mu\text{m}$                                | Brain region-dependent alterations in metallothionein, glutamate transporters, glutathione and tyrosine hydroxylase                                                                                                 |
| Erikson et al., 2008            | Mn | Rhesus monkeys               | Whole body inhalation   | MnSO <sub>4</sub> at 1.5 mg Mn/m <sup>3</sup> for 6 hr/day 5 days/week for 15, 33 or 65 days; ~2 $\mu\text{m}$                                       | Brain region-dependent alterations in metallothionein, glutamate transporters and glutathione levels, and reductions in tyrosine hydroxylase protein levels in globus pallidus                                      |
| Colin-Barenque et al., 2011     | Mn | Male CD-1 mice               | Whole body inhalation   | 0.02 M MnCl <sub>2</sub> 1 hr 2x/week for 12 weeks                                                                                                   | Swelling of mitochondria, endoplasmic reticulum and Golgi apparatus, nuclear invaginations and vacuolization of olfactory neurons; increases in apoptosis and necrosis of olfactory bulb neurons                    |
| Moberly et al., 2012            | Mn | Male and female OMP-spH mice | Intranasal instillation | Single exposure to 2-200 $\mu\text{g}$ MnCl <sub>2</sub>                                                                                             | Reduction in odorant-evoked neurotransmitter release even at 2 $\mu\text{g}$ MnCl <sub>2</sub>                                                                                                                      |
| Sanchez-Betancourt et al., 2012 | Mn | Male Wistar rats             | Whole body inhalation   | 0.04 M MnCl <sub>2</sub> and 0.02 M Mn (OAc) <sub>3</sub> for 1 hr 3x week for 6 mos; droplets in a 0.5-5 $\mu\text{m}$ range                        | Reductions in beam walking and single pellet reaching behaviors and 76% loss of dopaminergic neurons in substantia nigra pars compacta but not in globus pallidus or striatum                                       |

|                         |    |                                     |                         |                                                                                                                                |                                                                                                                                                                                                                                 |
|-------------------------|----|-------------------------------------|-------------------------|--------------------------------------------------------------------------------------------------------------------------------|---------------------------------------------------------------------------------------------------------------------------------------------------------------------------------------------------------------------------------|
| Carvalho et al., 2014   | Mn | 7-12 year old children              | Ambient airborne        | Mn hair measurement of 11.48 µg/g                                                                                              | Hair Mn was inversely associated with IQ and measures of inhibition responses, strategic visual information and verbal working memory                                                                                           |
| Saputra et al., 2016    | Mn | Male Sprague Dawley rats            | Nose only inhalation    | MnCl <sub>2</sub> at 39 mg/m <sup>3</sup> for 4 hr day for 5 days/week for 3 weeks; 1.2 µm                                     | Alterations in dopamine transporter and dopamine receptor protein expression levels in striatum; no effect on rotarod                                                                                                           |
| Foster et al., 2018     | Mn | Male F344 rats                      | Intranasal instillation | 40 µL of a 200 mM solution of MnCl <sub>2</sub>                                                                                | Reduction in olfactory discrimination; inflammation of olfactory epithelium                                                                                                                                                     |
|                         |    |                                     |                         |                                                                                                                                |                                                                                                                                                                                                                                 |
| Yargicoglu et al., 1999 | S  | Male Swiss albino rats              | Whole body inhalation   | SO <sub>2</sub> at 10 ppm for 1 hr/day for 7 days/wk for 6 wks                                                                 | Increased brain levels of Cu,Zn-SOD activity and thiobarbituric acid reactive substances and decreased brain levels of glutathione peroxidase                                                                                   |
| Kilic, 2003             | S  | Male Swiss albino rats              | Whole body inhalation   | SO <sub>2</sub> at 10 ppm for 1 hr/day for 7 days/wk for 6 wks                                                                 | Increased brain levels of Cu,Zn-SOD activity and thiobarbituric acid reactive substances and decreased brain levels of glutathione peroxidase; altered visual evoked potentials                                                 |
| Meng and Zhang, 2003    | S  | Male and female Kunming albino mice | Whole body inhalation   | SO <sub>2</sub> at 22, 56 or 112 mg /m <sup>3</sup> for 6 hr/day for 7 days                                                    | Sex- and concentration-dependent increases in brain thiobarbituric acid reactive substances and reductions in glutathione                                                                                                       |
| Meng, 2003              | S  | Male and female Kunming albino mice | Whole body inhalation   | SO <sub>2</sub> at 56 mg /m <sup>3</sup> for 6 hr/day for 7 days                                                               | Significant reduction in brain in superoxide dismutase and glutathione peroxidase and glutathione, increased thiobarbituric acid reactive substances                                                                            |
| Wu and Meng, 2003       | S  | Male Kunming albino mice            | Whole body inhalation   | SO <sub>2</sub> at 22, 64 or 148 mg /m <sup>3</sup> for 6 hr/day for 7 days                                                    | Dose-dependent changes in brain in glutathione-S-transferase and glucose-6-phosphate dehydrogenase with reductions in glutathione                                                                                               |
| Meng et al., 2005       | S  | Male Kunming albino mice            | Whole body inhalation   | SO <sub>2</sub> at 1.25, 28 or 56 mg /m <sup>3</sup> for 4 hr/day for 7 days                                                   | SO <sub>2</sub> inhalation results in transformation to sulfite that accumulates in brain                                                                                                                                       |
| Meng and Liu, 2007      | S  | Male Kunming albino mice            | Whole body inhalation   | SO <sub>2</sub> at 28 or 56 mg /m <sup>3</sup> for 4 hr/day for 7 days                                                         | Observations of damage to cerebral cortical neurons, glia and fibers                                                                                                                                                            |
| Qin et al., 2012        | S  | Male Wistar rats                    | Whole body inhalation   | SO <sub>2</sub> at 3.5, 7 or 14 or 56 mg /m <sup>3</sup> for 4 hr/day for 30 days                                              | Increased mitochondrial biogenesis in cerebral cortex                                                                                                                                                                           |
| Yun et al., 2013        | S  | Male Wistar rats                    | Whole body inhalation   | SO <sub>2</sub> at 3.5 or 7 mg /m <sup>3</sup> for 6 hr/day for 90 days                                                        | Inhibition of markers of synaptic plasticity in hippocampus in aged rats with opposite                                                                                                                                          |
| Yao et al., 2014        | S  | Male Wistar rats                    | Whole body inhalation   | SO <sub>2</sub> at 3.5 or 7 mg /m <sup>3</sup> for 6 hr/day for 4 weeks or 14 or 28 mg /m <sup>3</sup> for 6 hr/day for 1 week | Differential synaptic injury caused by 1 week vs. 4 week exposure, with inhibition of Arc and glutamate receptors in both 1 and 4 week exposures, but increases in synaptophysin, PSD-95, PKA and PKC only in the 1 week group. |
| Yao et al., 2015        | S  | Male Wistar rats                    | Whole body inhalation   | SO <sub>2</sub> at 3.5 or 7 mg /m <sup>3</sup> for 6 hr/day for 90 days                                                        | Reductions in target crossing and time spent in target quadrant, in glutamate receptor mRNA in hippocampus and PKA and PKC; increased levels of cytokines in hippocampus                                                        |
|                         |    |                                     |                         |                                                                                                                                |                                                                                                                                                                                                                                 |

|                        |    |                                                              |                         |                                                                                                                                                             |                                                                                                                                                                                                       |
|------------------------|----|--------------------------------------------------------------|-------------------------|-------------------------------------------------------------------------------------------------------------------------------------------------------------|-------------------------------------------------------------------------------------------------------------------------------------------------------------------------------------------------------|
| Rollin et al., 1991    | Al | Adult female SPF New Zealand white rabbits                   | In home cage 'dusting'  | Al <sub>2</sub> O <sub>3</sub> at 0.56 mg Al/m <sup>3</sup> for 8 hr/day 5 days/week for 5 mos                                                              | Preferential accumulation of Al in brain relative to kidney, heart or bone                                                                                                                            |
| Kwon et al., 2013      | Al | Male Sprague Dawley rats                                     | Intranasal instillation | Al NPs at 1, 20 or 40 mg/kg body weight administered every other day for 3 days; 5-100 nm                                                                   | Al can be taken up by olfactory bulb and distribute to other brain regions where it modulates gene and protein expression of MAPK and its activity                                                    |
| Zhang et al., 2015     | Al | Male and female ICR mice                                     | Whole body exposure     | Al <sub>2</sub> O <sub>3</sub> NPs at 0.5 mg/m <sup>3</sup> for 6 hr/day for 28 days; ~40 nm                                                                | Females exhibited increased immobility in a forced swim test; alterations in cortex of both sexes in neurotransmitter and voltage-gated gene expression and metabolomic analyses related to glutamate |
| Parveen et al., 2017   | Si | Male Wistar rats                                             | Intranasal instillation | Si NPs at 150 µg/50 µL daily for 30 days; 80 or 10 nm                                                                                                       | Increases in malondialdehyde, H <sub>2</sub> O <sub>2</sub> , NF-κB, TNF-α, IL-1β and MCP-1 and reductions in glutathione, superoxide dismutase, catalase in cortex, striatum and hippocampus         |
| Lebedova et al., 2018  | Pb | Adult female ICR mice                                        | Whole body inhalation   | PbO NPs at 406.6 µg/m <sup>3</sup> for 4, 12, 24 or 72 hr or 39.1 or 192.5 µg/m <sup>3</sup> for 24 hr/day 7 days/week for 1, 3, 7 or 11 weeks; 7.64-120 nm | Spongiform changes typical of degeneration in hippocampus including neuronal vacuolization and increase in necrotic neurons after high concentration for 11 weeks                                     |
| Blahova et al., 2019   | Pb | Adult female ICR mice                                        | Whole body inhalation   | PbO NPs at 192.5 µg/m <sup>3</sup> for 24 hr/day 7 days/week for 2, 5, 13 or 11 weeks;                                                                      | Uptake via olfactory nerve; longer exposures increased lipid peroxidation in brain                                                                                                                    |
| Sutunkova et al., 2020 | Pb | Outbred white female rats from institutional breeding colony | Nose only inhalation    | PbO at 1.3 mg/m <sup>3</sup> for 4 hr/day for 5 days/week                                                                                                   | Particle deposition in olfactory bulb; no change in locomotor activity; increase in temporal summation of sub-threshold indices in neurobehavioral test, otherwise undefined                          |
